# Supplementary material for: Assembly of Carbon Dots Into Frameworks With Enhanced Stability and Antibacterial Activity
Source: Research Square preprint supplement (doi:10.21203/rs.3.rs-466450/v1), 2021-05-06
Supplement: Supplementary file 1 [file 4e621bb5d2eea5d515d5d502.docx]

Assembly of carbon dots into frameworks with enhanced stability and antibacterial antibacterial activity

Pengfei Zhuang1, 2, Kuo Li1, Daoyong Li1, Haixia Qiao2, Yifeng E3, Mingqun Wang4, Jiachen Sun1, Xifan Mei1* and Dan Li1, 2*

1 Department of Orthopedics, the First Affiliated Hospital of Jinzhou Medical University, Jinzhou, China;

2 Department of Basic Science, Jinzhou Medical University, Jinzhou, China;

3 Department of pharmacology, Jinzhou Medical University, Jinzhou, China；

4 Department of Basic Medical Science, Jinzhou Medical University, Jinzhou, China；

*** Correspondence:**

meixifan@jzmu.edu.cn; danli@jzmu.edu.cn

The morphology and size of the as-obtained carbon dots (CDs) were characterized by transmission electron microscopy (TEM) and atomic force microscope (AFM) as shown in Figure S1. The CDs are initially nearly spherical with an average diameter smaller than 5.4 nm. However, after a long time of exposure to the air, the mono-dispersed morphology could not be kept.


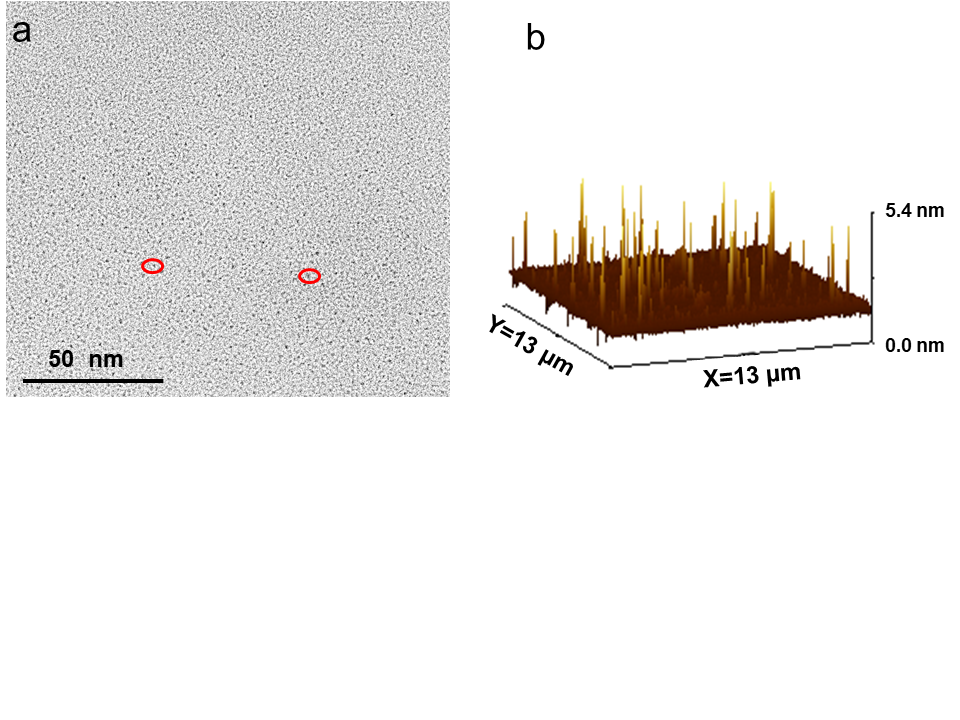


**Figure S1.** TEM (a) and AFM (b) of the as-obtained CDs.

The optical properties of the CDs were investigated using the UV-visible (UV-vis) absorption and fluorescence spectra at room temperature (Figure S2). No obvious absorption above 240 nm for L-cysteine was obtained for the UV-vis spectra (Figure S2a), indicating the formation of CDs. The fluorescence spectra of the CDs showed the maximum emission at approximately 430 nm with 350 nm excitation (Figure S2b).


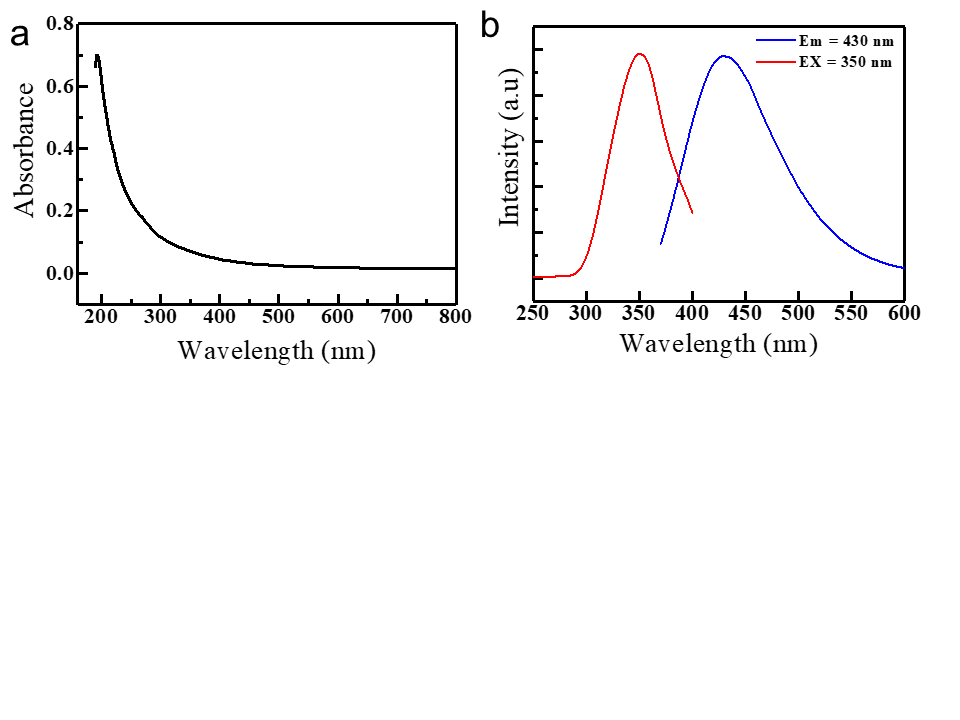


**Figure S2.** (a) UV-vis, (b) the fluorescence excitation and emission spectra of the CDs.

The X-ray surface photoelectron spectra (XPS) results indicate that the CDs are mainly composed of carbon (C), nitrogen (N), sulfur (S), and oxygen (O) (Figure 1A). Fourier transform infrared spectroscopy (FTIR) analysis of CDs showed the stretching vibration signals of C-N, N-H, S-H, C-O-C, C-S, C-N. These results indicated that various carboxyl and amine functional groups were present on the surfaces of CDs.


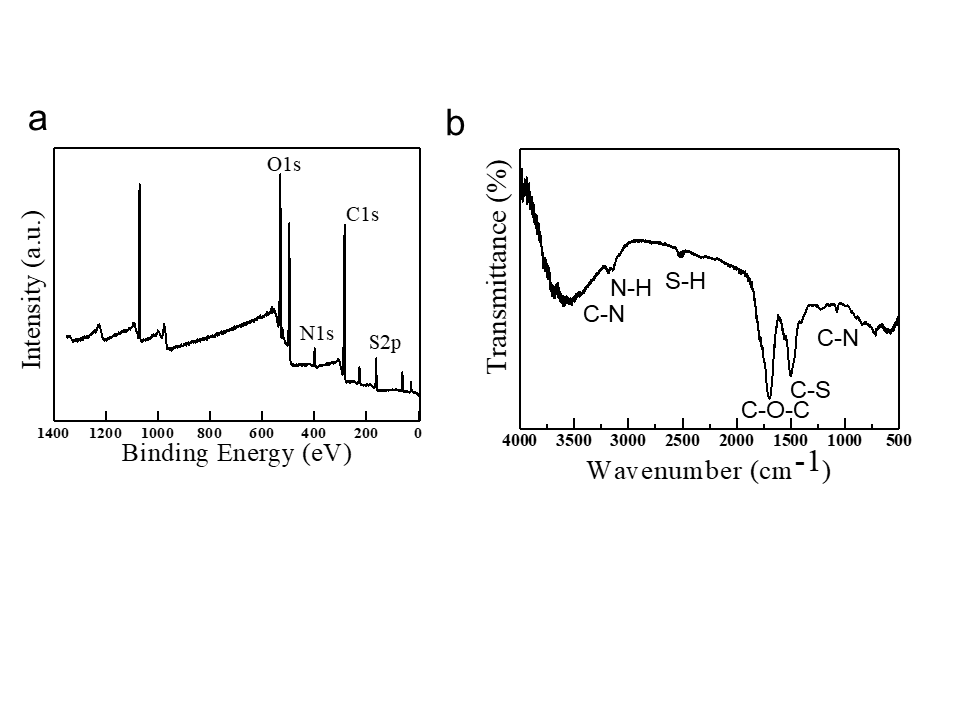


**Figure S3.** XPS survey (a) and FTIR of the as-obtained CDs.

The fluorescence decay curves are fitted with a sum of two exponential functions (Table S1).

I=A+B1exp(-t/t1)+B2exp(-t/t2)

**Table S1** Lifetime simulation parametrial of CDs and CDs-based frameworks (CDFs)

|  | B1 | t1 (ns) | B2 | t2 |
| --- | --- | --- | --- | --- |
| CDs | 1134.16 | 2.45 | 428.46 | 7.47 |
| CNS | 1128.67 | 1.98 | 373.4709 | 7.30 |
